# Supplementary material for: Removal of the Rhodamine B Dye at Ti/Ru0.3Ti0.7O2 Anode Using Flow Cell System
Source: Hindawi journal article supplement (doi:10.1155/2019/1424797), 2019-10-30
Supplement: f1 [file 1424797.f1.docx]

**“Supplementary Materials”**

**Removal of the Rhodamine B dye at Ti/Ru0.3Ti0.7O2 anode using flow cell system**

Ali Baddouh*1, Brahim El Ibrahimi**1, Elhassan Amaterz2, M. Mohamed Rguiti1, Lahcen Bazzi1, Mustapha Hilali1

1 Applied Chemistry-Physic Team, Faculty of Sciences, Ibn Zohr University, B.P. 8106, 80000, Agadir, Morocco

2 Laboratory of Materials and Environment, Ibn Zohr University, B.P. 8106, 80000, Agadir, Morocco

**Corresponding authors:** * [ali.baddouh@gmail.com](mailto:ali.baddouh@gmail.com); ** [brahim.elibrahimi@edu.uiz.ac.ma](mailto:brahim.elibrahimi@edu.uiz.ac.ma)

**Fig S1:** Spectra of samples of electrolysis in different NaCl concentration from solutions containing 80 mg L-1 of Rh-B (current density: 3.9 mA cm-2, flow rate: 30 L h-1 and T: 25 °C) during 90 min.

**Fig S2:** Spectra of samples of electrolysis in different Na2SO4 concentration from solutions containing 80 mg L-1 of Rh-B (current density: 3.9 mA cm-2, flow rate: 30 L h-1 and T: 25 °C) during 90 min.
